# Supplementary material
Source: MDPI journal article supplement (https://www.mdpi.com/2073-4433/11/8/860)

# ICE STORM WARNING

(meaning: occasions when damaging accumulations of ice are expected during freezing rain situations.)

Please evaluate the term above according to how you feel: **Calm** versus **Excited**.

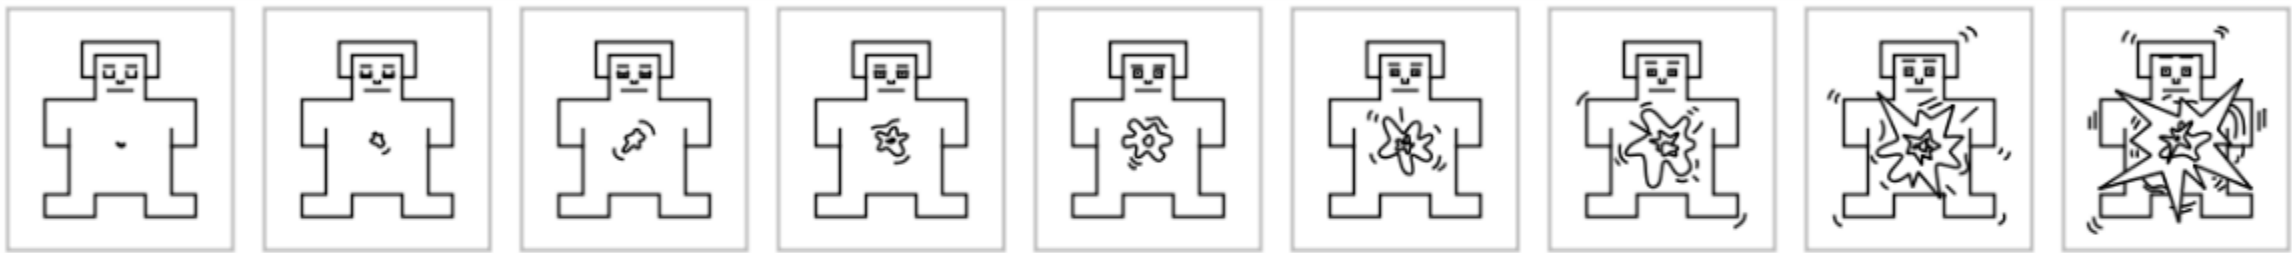

Please evaluate the term above according to how you feel: **Unsurprising** versus **Surprising**.

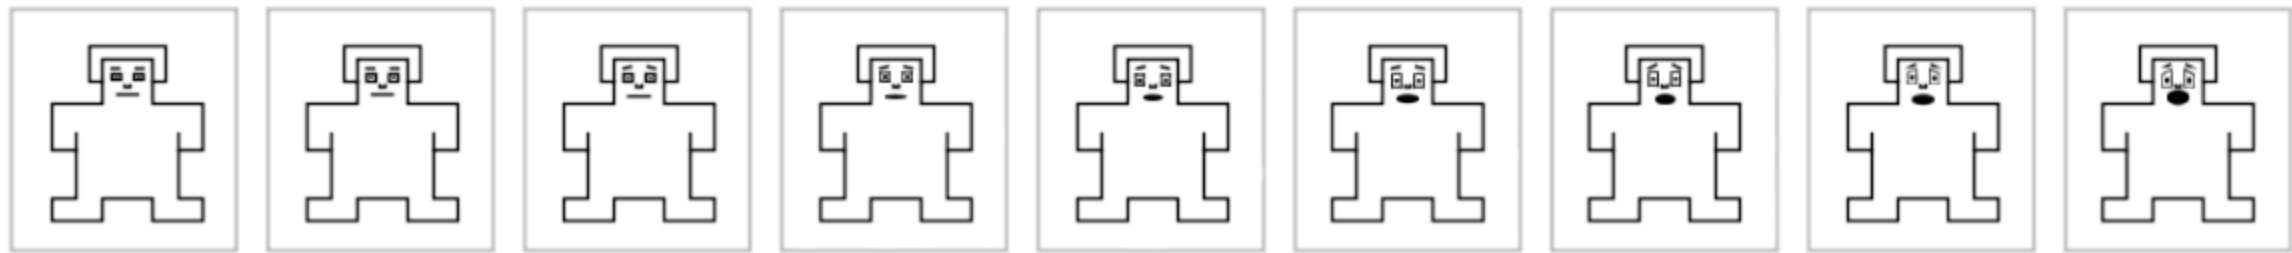

**Please evaluate the term above according to how you feel:  
Controlled/Passive versus In Control/Dominant.**

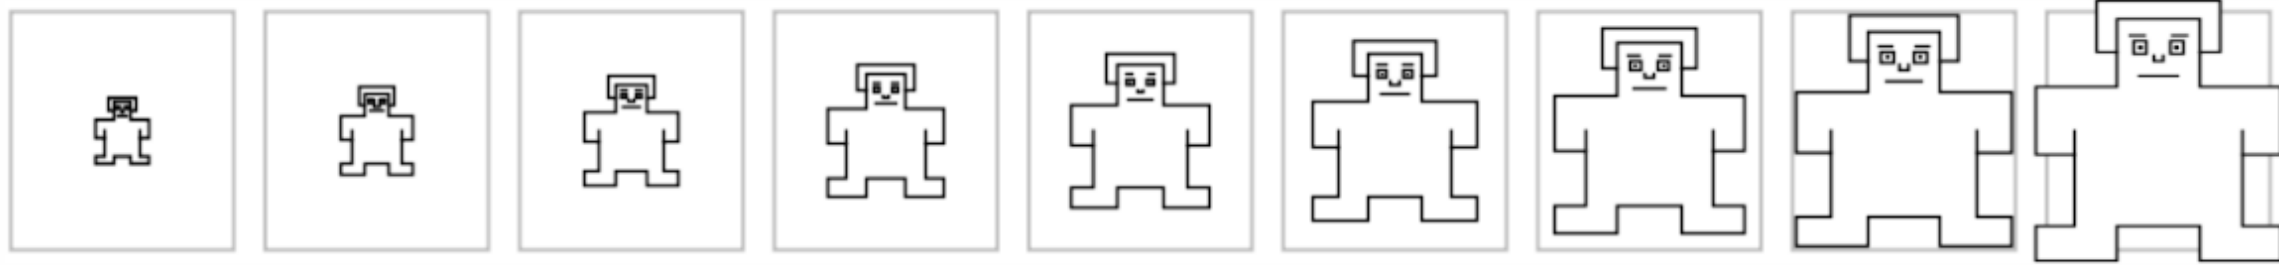

**Please evaluate the term above according to how you feel:  
Unhappy versus Happy.**

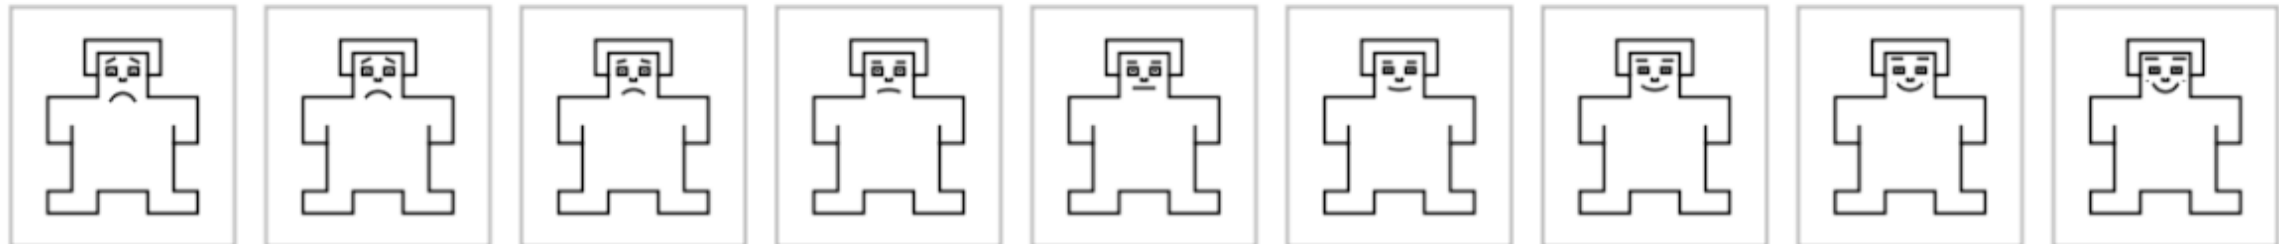

Supplement: s1 [file s1]
