# Supplementary material
Source: MDPI journal article supplement (https://www.mdpi.com/2073-4433/11/8/860)
Supplement: s1 [file s1]

Archive with 2 entries (2 files):
- atmosphere-883768 supp Table S1.xlsx
- atmosphere-883768-supp Table S2.pdf
