# Supplementary material
Source: MDPI journal article supplement (https://www.mdpi.com/2073-4433/11/8/860)
Supplement: s1 [file s1 › atmosphere-883768 supp Table S1.xlsx]

## Sheet: Sheet1
Term	Valence		Arousal		Dominance		Surprise		Cluster3
	Mean2	SD	Mean	SD	Mean	SD	Mean	SD
1. Airy	7.33	1.69	4.04	2.67	6.44	1.84	3.76	1.98	1
2. Arctic	3.32	2.34	5.42	2.35	3.14	2.15	6.27	2.15	2
3. Arid	4.17	1.91	3.7	1.81	4.92	1.93	4.15	2.06	3
4. Bad (weather)	2.74	1.76	5.53	2.05	3.14	1.77	5.14	2.28	2
5. Balmy	6.05	2.07	4.5	2.03	5.73	2.12	4.28	1.91	1
6. Bleak	3.07	1.78	3.51	1.89	4.02	1.91	4.24	2.07	3
7. Blizzard (n)1	4.06	2.37	6.64	2.01	3.19	2.01	7.59	1.88	2
8. Blustery	4.22	1.86	5.41	1.69	4.12	1.77	5.87	1.94	2
9. Bone-chilling	2.44	2.02	4.96	2.56	3.94	2.44	5.88	2.37	2
10. Breezy	5.66	1.98	4.81	2.04	5	1.89	4.65	1.91	1
11. Bright	7.99	1.43	5.32	2.75	6.75	1.97	4.04	2.31	1
12. Brilliant	7.5	1.73	5.97	2.42	6.6	2.03	5.07	2.19	1
13. Brisk	6.67	2.11	5.06	2.4	6.07	2.1	4.55	2.11	1
14. Calm	7.39	1.65	2.68	2.44	6.56	2.38	2.92	1.93	1
15. Chilly	4.41	2.17	4.27	2.14	4.6	1.86	4.47	1.97	3
16. Clear	7.77	1.54	4.17	2.79	6.92	1.92	3.76	2.53	1
17. Cloudy	4.7	1.79	3.16	1.63	5.01	1.74	3.3	1.75	3
18. Cold	4.43	2.36	4.3	2.33	4.46	2.21	4.63	2.48	3
19. Comfortable	7.85	1.57	4.04	2.9	7.01	2.27	3.81	2.23	1
20. Cool	6.55	1.84	4.54	2.27	6.02	1.84	4.16	1.91	1
21. Crisp	6.77	1.92	4.8	2.34	6.12	1.96	4.7	2.09	1
22. Damp	3.81	1.5	3.52	1.64	4.19	1.72	3.48	1.56	3
23. Dark	4.05	2.11	4.45	2.19	3.88	2.24	4.4	2.12	3
24. Depressing	2.28	1.61	3.11	2.11	3.21	2.15	4.02	2.13	3
25. Dim	4.21	1.63	3.36	1.67	4.56	1.79	4.17	1.8	3
26. Dismal	3.06	1.89	3.43	1.99	4.16	2.12	3.78	1.87	3
27. Drab	3.33	1.69	2.93	1.68	4.2	2.08	3.51	1.77	3
28. Dreary	3.17	2.02	3.03	1.76	3.83	2.04	3.5	1.78	3
29. Drizzle (n)	4.52	1.55	3.44	1.85	4.99	1.87	3.31	1.72	3
30. Drizzly	4.63	2.04	3.38	1.74	4.83	1.7	3.63	1.61	3
31. Drought (n)	2.59	1.52	4.32	2.02	3.1	1.79	5.18	2.35	2
32. Dry	4.85	1.79	3.65	1.7	5.13	1.89	4.23	1.9	3
33. Dull	3.64	1.77	2.59	1.7	4.51	2.04	3.13	1.6	3
34. Dusty	3.41	1.64	4.29	1.87	4.04	1.69	5.74	2.14	3
35. Fair	6.69	1.71	3.44	2.3	6.16	2.05	3.53	1.97	1
36. Fall (n)	7.86	1.72	6.02	2.75	6.75	2.06	3.94	2.25	1
37. Fine	7.41	1.95	4.5	2.6	6.75	2.21	4.08	2.33	1
38. Flash Flood (n)	2.64	1.71	6.03	2.23	2.96	2.13	7.07	2.1	2
39. Flash Flood Warning (n)	2.8	1.62	5.93	2.18	3.36	2.08	6.43	2.17	2
40. Flood (n)	2.36	1.44	5.76	2.23	2.87	1.93	6.4	2.3	2
41. Flood Warning (n)	2.59	1.45	5.85	2.25	3.02	2.07	6.62	2.04	2
42. Fog (n)	4	1.82	3.89	2.17	3.83	1.65	4.49	2.18	3
43. Foggy	4.15	1.58	4.38	1.98	3.95	1.87	4.95	1.9	3
44. Freeze (n)	3.62	2.34	4.67	2.39	3.65	2.05	5.69	2.48	2
45. Freeze Warning (n)	3.64	2.16	5.31	2.16	3.89	1.82	5.77	2.21	2
46. Freezing	3.42	2.19	4.52	2.28	4.19	2.18	5.05	2.35	3
47. Freezing Rain (n)	3.3	1.68	5.27	1.67	3.45	1.65	5.93	1.92	2
48. Fresh	6.65	1.98	4.42	2.56	6.07	2.26	4.36	2.28	1
49. Frigid	3.37	2.11	4.38	2.16	3.86	2.02	5.12	2.13	3
50. Frost	4.49	2.09	4.91	2.04	4.49	1.95	5.27	2.11	3
51. Frosty	4.64	2.01	4.72	1.88	4.27	1.73	5.13	2.11	3
52. Frozen	3.89	1.95	4.93	2.06	3.94	2.07	5.57	2.08	2
53. Gloomy	2.89	1.84	2.83	1.81	4.02	2.19	3.67	1.85	3
54. Good (weather)	8.36	1.35	5.22	3.02	7.31	1.74	4.18	2.31	1
55. Gray	3.69	1.97	2.84	1.77	4.52	2.05	3.64	1.87	3
56. Gusty	4.28	1.77	4.86	1.99	4.1	1.86	5.21	1.89	3
57. Hail (n)	2.93	1.66	5.97	1.93	3.04	1.86	6.49	2.04	2
58. Harsh	2.63	1.51	5.65	2	3.24	2	5.88	2.14	2
59. Hazy	3.31	1.56	4.1	1.93	3.75	1.93	4.92	1.93	3
60. Hot	4.83	2.26	4.87	2.04	5.3	2.14	3.99	2.18	3
61. Humid	3.02	1.82	3.35	1.89	4.31	2.29	3.09	1.94	3
62. Hurricane (n)	2.21	1.59	6.91	2.25	2.45	2.03	7.17	2.21	2
63. Hurricane Warning (n)	2.4	1.61	6.92	2.25	2.74	2.21	7.59	1.87	2
64. Hurricane Watch (n)	2.74	1.81	6.62	2.28	2.9	2.28	7.1	2.08	2
65. Ice Storm (n)	3.4	2.09	6.07	1.92	3.04	1.76	6.75	2.2	2
66. Ice Storm Warning (n)	3.26	1.94	6.13	2.18	3.19	1.93	7.11	1.96	2
67. Icy	3.71	1.84	5.18	2.07	3.31	1.75	5.8	2.2	2
68. Inclement	3.42	1.75	4.57	2.15	4.13	1.72	4.72	2.17	3
69. Mild	6.36	1.84	4.22	2.38	6.1	2.02	3.94	2.07	1
70. Misty	4.54	1.5	3.3	1.51	4.86	1.71	4.03	1.74	3
71. Moist	4.11	1.8	3.64	1.92	4.86	1.98	3.92	1.95	3
72. Muggy	2.74	1.86	3.55	2.07	3.95	2.07	3.58	1.86	3
73. Nippy	4.82	2.13	4.37	2.09	5.22	2.15	4.59	2.05	3
74. Overcast	4.52	1.91	3.1	1.84	4.71	2.22	3.53	1.89	3
75. Parched	2.85	1.66	4.19	2.06	3.64	2.08	4.75	2.03	3
76. Partly Cloudy	6.09	1.65	3.45	2.08	6.06	1.86	3.33	1.83	1
77. Precipitation (n)	5.03	1.73	4.4	1.8	5.05	1.68	4.44	1.72	3
78. Predictable	6.2	1.78	3.39	2.25	6.48	2.13	3.23	2.3	1
79. Rain (n)	4.76	2.12	3.93	2.02	4.71	1.81	3.91	2.06	3
80. Rainfall (n)	5.18	2.21	3.68	2.03	5.13	1.97	3.8	1.82	3
81. Rainy	4.92	2.17	4.05	1.96	4.91	2.04	3.92	1.82	3
82. Raw	3.28	1.78	3.48	1.87	3.87	1.73	4.38	1.98	3
83. Rough	3.06	1.67	5.44	2.24	3.27	1.8	5.54	2.15	2
84. Scorching	2.93	2.1	4.7	2.34	4.16	2.19	4.65	2.35	3
85. Searing	2.74	2.08	4.93	2.51	3.43	2.11	5.17	2.73	2
86. Serene	8.1	1.43	3.28	2.72	6.88	2.26	3.79	2.43	1
87. Severe	2.84	1.62	6.42	2.15	3.12	1.84	6.69	2.06	2
88. Severe Thunderstorm (n)	3.63	2.01	5.96	2.1	3.38	2.02	6.09	2.23	2
89. Severe Thunderstorm Warning (n)	3.56	1.97	6.51	1.8	3.51	2.09	6.33	2.04	2
90. Severe Thunderstorm Watch (n)	3.47	2.02	6	2.11	3.44	1.99	6.2	1.98	2
91. Shower (n)	4.82	1.99	4.23	1.91	4.64	1.82	4.7	1.87	3
92. Showery	4.52	1.85	3.87	1.94	4.49	1.89	4.17	1.91	3
93. Sizzling	3.3	2.24	5.25	2.28	3.88	2.17	5.04	2.52	2
94. Sleet (n)	3.86	1.89	4.99	1.93	3.93	1.8	5.84	2.1	2
95. Sloppy	2.84	1.89	3.94	2.09	3.61	1.94	4.65	1.97	3
96. Smoggy	2.64	1.56	4.36	2.1	3.35	1.78	5.08	2.16	3
97. Smoky	3.02	1.68	5.14	2.18	3.7	2.02	6.27	2.14	2
98. Snow (n)	7.27	1.72	6.7	2.18	4.88	1.78	7.02	1.97	1
99. Snowy	6.79	1.79	6.07	2.04	4.82	2.09	6.86	1.95	1
100. Soaking	2.87	1.8	4.37	1.93	3.61	1.81	4.97	1.99	3
101. Soggy	3.21	1.75	3.5	1.85	3.9	2.06	4.07	2.1	3
102. Somber	3.31	1.71	2.94	1.89	4.09	2.04	3.64	1.98	3
103. Sopping	2.99	1.77	3.93	1.86	3.74	1.93	4.64	2.17	3
104. Spring (n)	7.48	1.6	5.74	2.28	6.33	1.96	4.05	2.12	1
105. Squally	3.93	1.73	5.46	1.93	3.9	1.7	5.68	1.96	2
106. Stable	6.56	1.71	3.23	2.14	6.44	2.11	3.5	2.16	1
107. Steamy	3.46	1.81	3.63	1.8	3.83	1.98	3.64	1.98	3
108. Stormy	4.19	2.17	5.5	2.13	3.94	2.05	5.34	2.21	2
109. Sultry	3.96	2.22	4.13	2.01	4.38	2.03	3.97	2.04	3
110. Summer (n)	7.45	2.04	5.8	2.9	7.06	1.98	3.85	2.62	1
111. Summery	7.31	1.7	5.62	2.55	6.46	1.85	4.1	2.36	1
112. Sunless	3.27	2.03	3.63	1.94	4.19	1.98	4.33	2.13	3
113. Sunny	8.04	1.52	5.08	2.92	6.75	2.11	4.14	2.26	1
114. Sunshine (n)	8.17	1.17	5.66	3.05	6.76	2.19	4.38	2.46	1
115. Sweltering	2.57	1.85	4.9	2.34	3.33	2.23	5.16	2.41	2
116. Temperate	6.13	1.67	3.81	1.99	5.94	1.8	3.67	1.83	1
117. Tempestuous	3.76	1.94	5.14	1.96	3.67	1.79	5.24	2.12	2
118. Threatening	2.76	1.78	6.34	2.15	2.93	1.9	6.76	2.07	2
119. Thunder (n)	4.56	2.31	5.62	2.11	4.15	2.04	5.53	2.16	2
120. Thundershower (n)	4.6	2.04	5.32	2.04	4.08	1.89	5.23	1.84	3
121. Thunderstorm (n)	4.76	2.33	5.21	2.4	3.94	2.1	5.27	2.38	3
122. Tornado (n)	2.22	1.73	7.11	2.26	2.28	1.93	7.41	2.1	2
123. Tornado Warning (n)	2.23	1.48	6.8	2.29	2.53	2	7.35	2.05	2
124. Tornado Watch (n)	2.63	1.61	6.42	2.03	2.92	2.02	6.59	2.05	2
125. Torrid	3.81	2.04	4.57	1.97	4.24	2.1	5.06	2.18	3
126. Turbulent	2.89	1.58	6.29	2.14	3.16	2.02	6.14	2.3	2
127. Unchanging	5.38	1.82	3.23	2.02	5.93	2.29	3.45	2.35	1
128. Unpredictable	3.45	1.71	5.72	1.95	2.89	1.89	6.24	2.22	2
129. Unsettled	3.79	1.47	4.39	1.97	3.63	1.77	4.71	2.08	3
130. Violent	2.29	1.78	6.42	2.55	2.85	2.27	7.04	2.35	2
131. Warm	7.34	1.7	4.62	2.66	6.57	1.94	3.69	2.3	1
132. Warning (n)	2.93	1.74	6.43	2.2	3.3	2.12	6.64	2.08	2
133. Watch (n)	3.61	1.54	5.63	1.82	3.67	1.78	5.74	2.08	2
134. Wet	3.86	1.68	3.62	2	4.29	2	3.66	2.01	3
135. Wild	3.4	2.09	6.1	2.23	3.07	1.8	6.01	2.1	2
136. Windy	4.75	1.89	5.15	1.82	4.24	1.87	5	2.17	3
137. Winter (n)	5.53	2.38	4.52	2.1	5.02	1.92	3.64	1.91	3
138. Winter Storm (n)	4.41	2.28	6.24	1.86	3.89	2.11	6.7	2.11	2
139. Winter Storm Warning (n)	4.11	2.34	6.18	2.28	3.36	1.83	6.78	2.29	2
140. Winter Storm Watch (n)	4.46	2.33	5.56	2.03	3.97	1.93	6.14	1.9	2
141. Wintry	5.13	2.04	4.91	1.91	4.71	1.75	5.09	1.98	3
Notes: 1 (n) beside a word in the first column indicates that it was presented as a noun. Otherwise the words were presented as adjectives descriptive of the weather. 2The number of respondents used in calculating the descriptive statistics ranged from 95 to 110. The differences in number were due to respondents being randomly assigned to respond to different words. 3Cluster membership: 1 = Fair …

## Sheet: Sheet2
Airy	1
Balmy	1
Breezy	1
Bright	1
Brilliant	1
Brisk	1
Calm	1
Clear	1
Comfortable	1
Cool	1
Crisp	1
Fair	1
Fall (n)	1
Fine	1
Fresh	1
Good (weather)	1
Mild	1
Partly Cloudy	1
Predictable	1
Serene	1
Snow (n)	1
Snowy	1
Spring (n)	1
Stable	1
Summer (n)	1
Summery	1
Sunny	1
Sunshine (n)	1
Temperate	1
Unchanging	1
Warm	1
Arctic	2
Bad (weather)	2
Blizzard (n)1	2
Blustery	2
Bone-chilling	2
Drought (n)	2
Flash Flood (n)	2
Flash Flood Warning (n)	2
Flood (n)	2
Flood Warning (n)	2
Freeze (n)	2
Freeze Warning (n)	2
Freezing Rain (n)	2
Frozen	2
Hail (n)	2
Harsh	2
Hurricane (n)	2
Hurricane Warning (n)	2
Hurricane Watch (n)	2
Ice Storm (n)	2
Ice Storm Warning (n)	2
Icy	2
Rough	2
Searing	2
Severe	2
Severe Thunderstorm (n)	2
Severe Thunderstorm Warning (n)	2
Severe Thunderstorm Watch (n)	2
Sizzling	2
Sleet (n)	2
Smoky	2
Squally	2
Stormy	2
Sweltering	2
Tempestuous	2
Threatening	2
Thunder (n)	2
Tornado (n)	2
Tornado Warning (n)	2
Tornado Watch (n)	2
Turbulent	2
Unpredictable	2
Violent	2
Warning (n)	2
Watch (n)	2
Wild	2
Winter Storm (n)	2
Winter Storm Warning (n)	2
Winter Storm Watch (n)	2
Arid	3
Bleak	3
Chilly	3
Cloudy	3
Cold	3
Damp	3
Dark	3
Depressing	3
Dim	3
Dismal	3
Drab	3
Dreary	3
Drizzle (n)	3
Drizzly	3
Dry	3
Dull	3
Dusty	3
Fog (n)	3
Foggy	3
Freezing	3
Frigid	3
Frost	3
Frosty	3
Gloomy	3
Gray	3
Gusty	3
Hazy	3
Hot	3
Humid	3
Inclement	3
Misty	3
Moist	3
Muggy	3
Nippy	3
Overcast	3
Parched	3
Precipitation (n)	3
Rain (n)	3
Rainfall (n)	3
Rainy	3
Raw	3
Scorching	3
Shower (n)	3
Showery	3
Sloppy	3
Smoggy	3
Soaking	3
Soggy	3
Somber	3
Sopping	3
Steamy	3
Sultry	3
Sunless	3
Thundershower (n)	3
Thunderstorm (n)	3
Torrid	3
Unsettled	3
Wet	3
Windy	3
Winter (n)	3
Wintry	3
